# Supplementary material for: Cardiac Hypertrophy in a Dish: A Human Stem Cell Based Model
Source: Preprints.org preprint supplement (doi:10.20944/preprints201911.0395.v1), 2019-11-30
Supplement: Supplementary file 1 [file supplementary]

A

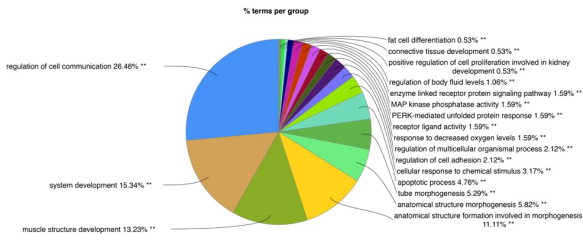

B

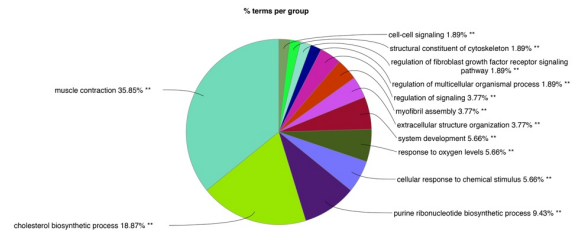

C

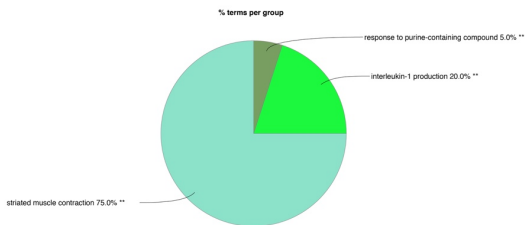

D

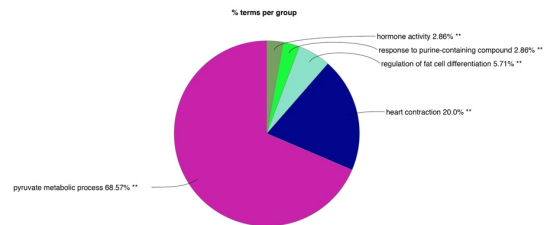

E

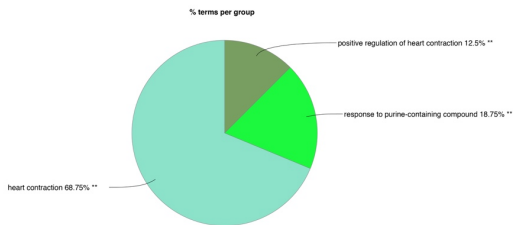

**Suppl. Figure 1.** Pie charts from ClueGO analysis. Input data are upregulated DEG. The pie charts show significantly overrepresented GO terms as % terms per group at the different time points. A) 8h B) 24h C) 48h D) 72h E) 96h.
